# Supplementary material for: Complete genome sequences of two strains of Treponema pallidum subsp. pertenue from Ghana, Africa: Identical genome sequences in samples isolated more than 7 years apart
Source: PLoS Negl Trop Dis. 2017 Sep 8;11(9):e0005894. doi: 10.1371/journal.pntd.0005894 (PMC5607219; doi:10.1371/journal.pntd.0005894)
Supplement: S1 Table — (XLS) [file pntd.0005894.s001.xls]

## Sheet: TableS1
Table S1: PSGS (Pool Segment Genome Sequencing) - List of primers used for amplification of TP intervals of CDC-2575 and Ghana-051 strains.
POOLa	TP-interval	Primer pair	Primer orientation	Primer sequence (5'->3')b	Primer coordinatesb		Primer length (nt)b	PCR product length (nt)b
POOL-1	TPI-1A	ES-154R	Forward	CGGCTGTATTTCGTTACTGTCTTGA	1135699	1135723	25	5931
		1A_newR	Reverse	CTGCGACATCCTCAGTACCA	3599	3618	20
POOL-1	TPI-1B	1B_newF	F	TTTGATCTCGTGCAGTGGAG	3313	3332	20	6074
		ES-72R_new	R	GAACTCGCCGGTAATGCTAC	9367	9386	20
POOL-1	TPI-2A-A	ES-71F	F	TCTCCCGAACGAGTTTCTAGTCTG	8920	8943	24	6599
		2A-A_newR	R	AGTGATTGTTGCGTGCATGT	15499	15518	20
POOL-1	TPI-2A-B1	2A-B-1-F	F	TCTCCATGCGGTAGATCTGATT	15108	15129	22	2501
		2A-B-1-R	R	CAGCGCGTTAATTCTCCCTATT	17587	17608	22
POOL-1	TPI-2A-B2	2A-B-2-F	F	AGAACTGGCAGAGAGTCATACA	17356	17377	22	2501
		2A-B-2-R	R	TCCCTTCCTGCTCGTATTTATC	19835	19856	22
POOL-1	TPI-2A-B3	2A-B-3-F	F	CGTGAAAGTGAGGGTGAAGTA	19347	19367	21	2482
		2A-B-3-R	R	CAAACGAAACTCTGCCAGCTAC	21807	21828	22
POOL-1	TPI-2B	TPI-2BF_new	F	AACAAGCAGGCTCTTTCGGTA	21358	21377	20	6962
		TPI-2B_newR2	R	GCGGTATGTCCACCGTATCT	28300	28319	20
POOL-1	TPI-3A-A	TPI-3-AF-Bosnia	F	TCGTAGGAAACAGGGACGAG	27562	27581	20	4731
		3A-A_newR	R	TATCACCCGTCAAACTGCAA	32273	32292	20
POOL-1	TPI-3A-B	3A-A_newF	F	CGGGGATATAACGCAAAGAA	31653	31672	20	4534
		TPI-3-AR-Bosnia	R	AGTGTACGAAACCCCAGACG	36167	36186	20
POOL-1	TPI-3B	TPI-3-BF-Bosnia	F	GTGCTCTCTAGCGTGGTGAC	35661	35680	20	6892
		TPI-3-BR-Bosnia	R	ATGGGGTTGACTCTCACGAC	42533	42552	20
POOL-1	TPI-4A-1	4A_newF	F	GCCAGAGCAGCATAAGGAAC	41511	41530	20	4838
		4A_newR1	R	TCATACTCGTCCGTGCTCTG	46329	46348	20
POOL-1	TPI-4B-A	TPI_4A-4B-F	F	CGAGAAAGACATGGACAGCA	46143	46162	20	5015
		TPI-4B-AR-Bosnia	R	ACCGAATTTGTAGCGTACCG	51138	51157	20
POOL-1	TPI-4B-B	TPI-4B-BF-Bosnia	F	GAGTCCACTACAGCGTCTCG	50789	50808	20	3471
		TPI-4B-BR-Bosnia	R	TAGCGTATCTCCACCCCAAC	54240	54259	20
POOL-1	TPI-5A-A	TPI-5A-AF-Bosnia	F	TGTATGCCCAGAAGGTGAAG	52900	52919	20	7247
		TPI-5A-AR-Bosnia	R	TCAGTGCTAGGGACACGTTG	60127	60146	20
POOL-1	TPI-5A-B	TPI-5A-BF-Bosnia	F	ATCCAAGATGAGTCGGATGC	59770	59789	20	5920
		TPI-5A-BR-Bosnia	R	AGAATGTGGGAGCGATCTTG	65670	65689	20
POOL-1	TPI-5B-A	TPI-5B-F	F	CGCTACCACACCCTATCATACCG	64800	64822	23	6541
		5B-A_newR	R	GAAGCCCCTCATACAGGACA	71321	71340	20
POOL-1	TPI-5B-B	5B-B_newF	F	GCACAAACAAGTGCGTGAGT	70718	70737	20	6611
		ES-119R	R	TGAAAGTCAGCCTGTTGAGCTAGAC	77304	77328	25
POOL-1	TPI-6A-A	ES-118F	F	TCATCAAAAAGAAGTACGCTGT	76498	76519	22	5050
		6A-A_newR	R	TTGATGCGGTACTTGTGGAA	81528	81547	20
POOL-1	TPI-6A-B	6A-B_newF2	F	GCCGCATTACGATTTTGAAG	81374	81393	20	4295
		6A-B_newR1	R	GTCGGCTCTATACGCTCGTC	85649	85668	20
POOL-1	TPI-6B-A	TPI-6BF	F	CCGTTACCGTGACAGATCCT	85395	85414	20	3488
		6B-A_newR	R	CACGCACAACGCATCTAATTC	88862	88882	21
POOL-1	TPI-6B-B	6B-B_newF (BIS)	F	GTTTGCGTGTCTGGAGGATGC	88474	88494	21	2661
		6B-B_newR (BIS)	R	CAGAAGACGTTGCGCTTCTAGC	91113	91134	22
POOL-1	TPI-7A-A	TPI-7AF	F	GCGCCTGATGAAAGTTGACC	90757	90776	20	5972
		7A-A_newR	R	TTACTGGGGTTGCTTTCCTG	96709	96728	20
POOL-1	TPI-7A-B	7A-B_newF	F	AGCCGAGTACGAGCATGAGT	95987	96006	20	5562
		TPI-7AR	R	CACGCGCTTCCAAATAGTCC	101529	101548	20
POOL-1	TPI-7B-A1	7B-A1_F (BIS)	F	TTACCGAGTGAGGAGTGGATTGG	101393	101415	23	3239
		7B-A1_R (BIS)	R	AATGCGCTTGCTGCACGATAC	104611	104631	21
POOL-1	TPI-7B-A2	7B-A2_F	F	TTGCGCAGTATCCAGACAATAAG	104400	104422	23	3494
		TPI-7B-AR-Bosnia	R	ATCAGGAAGACAGGGAGCTG	107874	107893	20
POOL-1	TPI-7B-B	TPI-7B-BF-Bosnia	F	CACGAACTCTTGCCTGTTCA	107391	107410	20	6205
		TPI-7B-BR-Bosnia	R	AGGACATCACCCCACAAGAG	113576	113595	20
POOL-1	TPI-8	ES-122F	F	GATTCTGCCGTTTTGGTAACTACTTG	113063	113088	26	5053
		ES-162F	R	TAACTCATGCCCAACAGTAGCTTG	118092	118115	24
POOL-1	TPI-9	ES-163R	F	GGATTGCTTTCTGTGTTTGAGACC	117579	117602	24	5351
		ES-151F	R	TTCACAGATTAACGGCATTGGAC	122907	122929	23
POOL-1	TPI-10A	ES-152R	F	ACCGCGGAACGAATCAAGTAG	122504	122524	21	5722
		10A_newR	R	GCGGAGAACTCGGGTAATTC	128206	128225	20
POOL-1	TPI-10B	10A_newF	F	AGTGTGTGTCGAACGCTCAG	127725	127744	20	6040
		ES-43R	R	CAATACCCCATCTCTCCGAGC	133744	133764	21
POOL-4	TPI-11A	ES-42F	F	TTATCAGCCTGAATCGTATGTCCC	133144	133167	24	4835
		TPI-11A-R	R	AGAGCCATTGTTGCAGTCTC	137959	137978	20
POOL-1	TPI-11B	TPI-11B-F	F	TCAGTGTCCTGTACGCCAAG	137894	137913	20	4509
		TPI-11B-R	R	GGGTACTGATGGTGAGTTCG	142383	142402	20
POOL-1	TPI-11C	TPI-11C-F	F	TGGCGTTTTCCTTGATAGAG	141882	141901	20	3995
		ES-35F	R	ATGTGCAAGTACTCCAACCTCTCG	145853	145876	24
POOL-1	TPI-12A-1	ES-36R	F	GGTTGGAGTACTTGCACATGTGG	145858	145880	23	3127
		12R-3127	R	CGTTGCACTACACTCGATTC	148965	148984	20
POOL-1	TPI-12A-3	12F-2761	F	GTCCAAAAGTGTGATGCTGT	148618	148637	20	3892
		TPI-12AF	R	CCAGTCCTTCCTGTGTGGTT	152490	152509	20
POOL-1	TPI-12B	TP0131-XL-F	F	AAGCTAAACGAGCCTCCACA	150275	150294	20	5421
		ES-50F	R	TCATACGTTTTTTCGCTCCACAC	155673	155695	23
POOL-1	TPI-13	ES-51R	F	TCTGCCTTACAGGTGACGTCCT	154900	154921	22	4761
		ES-25F	R	CTCCAATACACGAAACTATCTTGCG	159636	159660	25
POOL-1	TPI-14A-A	TPI-14A-AF-Bosnia	F	GTTAATTCCCGCAAATCACG	159288	159307	20	6495
		TPI-14A-AR-Bosnia	R	ATGCGTGTTGTCTTCTGCTG	165763	165782	20
POOL-1	TPI-14A-B	TPI-14A-BF-Bosnia	F	ACGTTAGTATGCGGGTCTGC	165277	165296	20	6847
		TPI-14A-BR-Bosnia	R	GCTCCTTTGTTCGAGGTCTG	172104	172123	20
POOL-1	TPI-14B-A1	TPI-14B-AF1-Bosnia	F	ACCGTCAGTGGGAGTTGTTC	170987	171006	20	4102
		TPI-14B-AR1-Bosnia	R	GGTAAAGGTTGGGGATACGG	175069	175088	20
POOL-1	TPI-14B-A2	TPI-14B-AF2-Bosnia	F	GAACTCAAAGGGCAGGTAG	174579	174597	19	7028
		TPI-14B-AR2-Bosnia	R	CCGGAGTAAAGTTCGCAGAC	181587	181606	20
POOL-1	TPI-14B-B1	TPI-14B-BF-Bosnia	F	TTCTCGTTCATTGTGCTCGT	178698	178717	20	2917
		SDTP0159-0160R	R	AGAGCGACCCGGAGTAAAGT	181595	181614	20
POOL-1	TPI-14B-B2	SDTP0159-0160L	F	GGACAAAAGAAGCGAACTGC	180859	180878	20	4582
		TPI-14B-BR-Bosnia	R	AACAACTCGCCTCCAATCTG	185421	185440	20
POOL-1	TPI-15A-A	ES-113R	F	TGTATGTCGTGCAGTTCTAGCCC	183634	183656	23	4842
		TPI-15A-1R	R	CGACATCGACTCAGCCTACA	188456	188475	20
POOL-1	TPI-15A-B	TPI-15A-2F	F	GTTCGCGTTGGTGTACCTTT	188148	188167	20	4596
		TP-15AR	R	ATGGTCTTAACGGTGGCTTG	192724	192743	20
POOL-1	TPI-15B-A	TP-15BF	F	GAACTCCACGAGCTTTTTCG	191747	191766	20	4312
		TPI-15B-1R	R	GGATGGCAAACCTGTTCACT	196039	196058	20
POOL-1	TPI-15B-B	TPI-15B-2F	F	CCACTGGATATCGGATGAAG	195509	195528	20	4988
		TPI-15B-2R	R	CTCGGCTGCTTATCCTGTTC	200477	200496	20
POOL-1	TPI15B-C	TPI-15B-3F	F	CACAGGACATCGACCACATC	199465	199484	20	3572
		TPI-15B-3R	R	ACCCATTCTCACGACCACTC	203017	203036	20
POOL-1	TPI15B-D	15B-D_newF	F	GAACAGGGACTGGATGTGGT	202821	202840	20	2914
		15B-D_newR	R	ATAAATCACACCCCGGTTCA	205715	205734	20
POOL-1	TPI-16A-A	TPI-16A-AF-Bosnia	F	TCTGCGTATTGAACGGATTG	205508	205527	20	6649
		TPI-16A-AR-Bosnia	R	CGCACAATGGTCTCGTAATC	212137	212156	20
POOL-1	TPI-16A-B	TPI-16A-BF-Bosnia	F	TTACGGTTCGTGTTGAGCAG	211766	211785	20	6403
		TPI-16A-BR-Bosnia	R	TGCTCCTGCAAAACATTCAC	218149	218168	20
POOL-1	TPI-16B-A	16B-A_newF	F	AAAGGAGCTGGGAAGAAGGA	217456	217475	20	6006
		16B-A_newR	R	CCATTACATCCCCAGGACAC	223442	223461	20
POOL-1	TPI-16B-B	16B-B_newF	F	AATTGACACAGCGGGTATGA	223277	223296	20	6199
		16B-B_newR	R	ACCGAACTAGGCAACGACAC	229456	229475	20
POOL-1	TPI-17A-A2	ES-45R	F	GAAGCAGAATGCTGTCTCTCGTG	229251	229273	23	7888
		TPI-17A-AR-Bosnia	R	AGCCTGTTCCGCTTGTACTG	237119	237138	20
POOL-1	TPI-17A-B	TPI-17A-BF-Bosnia	F	CTGTAGGGGCAAGATGATGG	236671	236690	20	6688
		TPI-17A-BR-Bosnia	R	CAGAATAGACGGTGACAACCA	243338	243358	21
POOL-1	TPI-17B1-A	17B1-A_newF	F	ACAGGTGAGGATCGTTGAGG	242906	242925	20	3475
		17B1-A_newR	R	TTTCACCCTGCTCATTTTCC	246361	246380	20
POOL-1	TPI-17B1-B	17B1-B_newF	F	GGCGCTTGTTGATTTACGTT	245917	245936	20	3942
		17B1-B_newR	R	ACCATAGGACGCAAATCAGG	249839	249858	20
POOL-1	TPI-17B2	TPI-17B2R	F	ACTGAGCGCGATGAAGAAAT	249074	249093	20	7411
		ES-77F	R	ATGGCGTACGTAGGTCCGTGT	256464	256484	21
POOL-2	TPI-19	ES-78R	F	GCGCAGTAAAAGAGGGACGAC	255635	255655	21	6413
		ES-56F	R	CATCATCACGTACAAACCATGAGG	262024	262047	24
POOL-2	TPI-20A	ES-57R	F	CCTCTCGCGTTATTGAGGCTC	261725	261745	21	4351
		20A_newR	R	GGCGAATCTGACTTGGAGAG	266056	266075	20
POOL-2	TP-20B-A	20B_newF	F	GGTGTCGGTAATCTCGGTGT	265490	265509	20	3029
		N+D_TP0256R	R	CGGAGGAGGGAAAGTTCTTC	268499	268518	20
POOL-2	TP-20B-B	N+D_TP0256F	F	TTGAAAGCATTGTACGCCTTT	267890	267910	21	2328
		ES-75F	R	TACTAAGCTTCCTCATCATCGTCTCC	270192	270217	26
POOL-2	TPI-21A-A	21A-F	F	GCTTACCCTCGCTCTGTTGA	268732	268751	20	3948
		21A-A-R	R	CGAGAGAACACCTTGAGCATCTTC	272656	272679	24
POOL-2	TPI-21A-B	21A-A-F	F	AGCCATTCAGTATAAGGCCAATTC	272374	272397	24	3899
		21A-R	R	GATAAAATCCGCGTGTCCTG	276253	276272	20
POOL-2	TPI-21C-A	21C-F	F	CGCGTCGGTATGTGTAAATC	275915	275934	20	2302
		21C-A_newR	R	TGCAGGAAACCTCATCCTTC	278197	278216	20
POOL-2	TPI-21C-B	21C-B_newF	F	TGCGATTGGTATGAGGACTG	278111	278130	20	6187
		21C-B_newR	R	GGGCACACGCAATGTAGTCT	284278	284297	20
POOL-2	TPI-21C-C	21C-C_newF	F	AAGCTATCGCACAGGGGTCT	284076	284095	20	4067
		21C-R	R	CAGCGAGAAAACCTGAATCC	288123	288142	20
POOL-2	TPI-21D	21D_newF	F	ACGAAAGCGACTGCTGAACT	287971	287990	20	2573
		21D_newR	R	GTGACGAACATGGACACCAG	290524	290543	20
POOL-2	TPI-23A-A	ES-109R	F	GTTTCGAACTGGAAAATACGTGTGTAC	289715	289741	27	5427
		23A-A_newR	R	CCCTCCTGATTTTCCACTGA	295122	295141	20
POOL-2	TPI-23A-B	23A-B_newF2	F	GACGGTTGTGTTTGTGGATG	294842	294861	20	4856
		23A-B_newR2	R	TCGCACAAATCACGCACTAC	299678	299697	20
POOL-2	TPI-23B-A	TPI-23BF	F	TGCTTCACTGATGCCAAAAG	299479	299498	20	4575
		23B-A_newR	R	TTGCCCGTCTTAATTTCACG	304034	304053	20
POOL-2	TPI-23B-B	23B-B_newF	F	GCACAGGTTAGGTTGGTGGT	303821	303840	20	4393
		ES-147F	R	GACAAGCGAGCGTGTAGGAGTC	308192	308213	22
POOL-2	TPI-24A-A	TPI_23-24A-F	F	GCGGAGGTACGATGCTAAAG	307895	307914	20	4899
		TPI-24A-AR-Bosnia	R	CGGATTGCGAAACAATACAC	312774	312793	20
POOL-2	TPI-24A-B1	TPI-24A-BF-Bosnia-new	F	AGGAGCGTCTTGCGTATGAG	311951	311970	20	2902
		TPI-24A-innerB-R-Bosnia	R	AGCACCACATTTACCGTCAG	314833	314852	20
POOL-2	TPI-24A-B2	TPI-24A-innerB-F-Bosnia	F	TCTGTAGTTGGGCTGTTTGG	314662	314681	20	3346
		TPI-24A-BR-Bosnia-new	R	GGTTCAGTACGGCTTCCAAC	317988	318007	20
POOL-2	TPI-24B-A	TPI-24(B)_newF	F	CCAGTGGAGCGGCACCGCAGTTAC	316219	316242	24	4947
		24B-A_newR	R	TCTTGCGTGACAAACACCTC	321146	321165	20
POOL-2	TPI-24B-B	24B-B_newF	F	GCAACCCCTTCGGTAAAGAG	320420	320439	20	4819
		ES-49R	R	CCGTGTGGTTCAAATCCAAACT	325217	325238	22
POOL-4	TPI-25A	ES-26F	F	TTCCGAGCCATATCTGCGTACT	325002	325023	22	5764
		TPI-25AR	R	CGTTTAATGTTCTGCGGCCGGTGTTTG	330739	330765	27
POOL-2	TPI-25B-A	TPI-25(B)newF	F	GGGCGCCTTCCGGCAGGACTCT	330289	330310	22	2001
		Nich323-R3	R	TGTGCTGCTTCTGGTTATGC	332270	332289	20
POOL-2	TPI-25B-B	Nich323-F2	F	GAAGACGCAAGCTCTACTGC	332036	332055	20	3821
		ES-47R	R	GGAACCACTATCTCCTTCGAGACAA	335832	335856	25
POOL-2	TPI-25B	TPI-25(B)newF	F	GGGCGCCTTCCGGCAGGACTCT	330289	330310	22	5568
		ES-47R	R	GGAACCACTATCTCCTTCGAGACAA	335832	335856	25
POOL-2	TPI-26A-1	TPI-26-AF-Bosnia	F	GTCGATCCCGACATACAGGT	335396	335415	20	2554
		SDTP0321-0322R	R	CCTTCGCCCATATACCTGAA	337930	337949	20
POOL-2	TPI-26A-2	SDTP0321-0322L	F	GTGTTCTGCGTGGTGTCAGT	337161	337180	20	4464
		SDTP0324-0325R	R	CATCACGTTCCCCTGTACCT	341605	341624	20
POOL-2	TPI-26A-3	SDTP0324-0325L	F	ACCCCGTATGTAGTGCTTGC	340891	340910	20	2392
		TPI-26-AR-Bosnia	R	GGCGTTATACGAAGCTCCAG	343263	343282	20
POOL-2	TPI-26B	TPI-26-BF-Bosnia	F	ATGGTTCAGTGTCGTTGCAG	342763	342782	20	7804
		TPI-26-BR-Bosnia	R	CTGACACCCGCCATAGTAGC	350547	350566	20
POOL-2	TPI-27A-A	ES-101F	F	CCTTGTTATCATGGACGAAGTAGGAC	349567	349592	26	4621
		27A-A_newR	R	TAGCCTGGTTTGATGGGTTC	354168	354187	20
POOL-2	TPI-27A-B	27A-A_newF	F	GTGCCTGTCCAGTTTGTGTG	354049	354068	20	4388
		TPI-27AR	R	AGTTTTTGGGGTTGTGCAAG	358417	358436	20
POOL-2	TPI-27B-A	TPI-27B-AF-Bosnia	F	CCATGACAGCAAGTCCAATG	355439	355458	20	5028
		TPI-27B-AR-Bosnia	R	GATGCTCAGTTGCTCTGCAC	360447	360466	20
POOL-2	TPI-27B-B	TPI-27B-BF-Bosnia	F	ATCGGGTTGAGAATGACTGC	360107	360126	20	5867
		TPI-27B-BR-Bosnia	R	AGTTCACTCGGGTCATCAGG	365954	365973	20
POOL-2	TPI-28A-A	ES-103F	F	TGAAATGTTACGCGCTAGAGGG	365594	365615	22	4284
		TPI-28A-1R	R	GTGGCATACTCCATTCTTGG	369858	369877	20
POOL-2	TPI-28A-B	TPI-28A-2F	F	CGCTATACGCTCCTCACTCC	369165	369184	20	4531
		TPI-28A-2R	R	TGGGACGCTCTTTTCTTATG	373676	373695	20
POOL-2	TPI-28A-C	TPI-28A-3F	F	ACAAGGTGTGAGGGAGTTGG	371973	371992	20	3697
		TPI-28A-3R	R	ATGTGCCTGAGTGCTTCTTC	375650	375669	20
POOL-2	TPI-28A-D	28A-D_newF	F	CATGCAATTCAGTCGAAACG	375396	375415	20	3498
		28A-D_newR	R	AGAGAAACACCCGTCACACC	378874	378893	20
POOL-2	TPI-28B-A	TPI-28B-AF-Bosnia	F	ACGTATTGGGAGTCGGTGAC	377436	377455	20	6234
		TPI-28B-AR-Bosnia	R	AACACCCTCTGCTACGCACT	383650	383669	20
POOL-2	TPI-28B-B	TPI-28B-BF-Bosnia	F	TCCAACGCGCATACAACTAC	383152	383171	20	6100
		TPI-28B-BR-Bosnia	R	TATAGTTCTTCGCGCCCAGT	389232	389251	20
POOL-2	TPI-29A-A	ES-33F	F	CAGATTGGTCAAATCTTGACAAGTGA	388990	389015	26	5919
		29A-A_newR	R	GAGACAAAGAATCCGCAAGC	394889	394908	20
POOL-2	TPI-29A-B	29A-B_newF	F	GAAAAACGCGATCACCTAGC	394031	394050	20	5951
		TP-29AR	R	GTTACGCGGGTCTTTGGTAA	399962	399981	20
POOL-2	TPI-29B-A	29B-A_newF	F	GAGTATGGAGCGAAGGGACA	399772	399791	20	3174
		29B-A_newR2	R	ATTACGCACTGGGAGGTGAG	402926	402945	20
POOL-2	TPI-29B-B	29B-B_newF2	F	TGTATTCGGTAAGCGGGTTC	402682	402701	20	3176
		29B-B_newR	R	GTGCCGTGGAAGGATTTAGA	405838	405857	20
POOL-2	TPI-29C	29C-F	F	CCGCTACTTTTGCTTCGTTC	405701	405720	20	4899
		29C-R	R	GCGACTGCGGTAAACCTATC	410580	410599	20
POOL-2	TPI-30A-A	ES-69R	F	GTACAATCTCGATGAAAAGGGGC	408201	408223	23	4983
		TPI-30A-1R	R	AGAGGAACAAGCTGATCGTG	413164	413183	20
POOL-2	TPI-30A-B	TPI-30A-2F	F	GAGGGAGCGTGAAGAAACAG	412625	412644	20	5081
		TPI-30AF	R	GAGCAATCTTGTGCGTTTCA	417686	417705	20
POOL-2	TPI-30B-A	TPI-30BR	F	CACACGTGGAAAATGGACAG	416848	416867	20	4780
		TPI-30B-1R	R	ACATATCGCTGGGTGGTAGA	421608	421627	20
POOL-2	TPI-30B-B	TPI-30B-2F	F	CACAGTTTTGCTTCGACGTT	421530	421549	20	3663
		TPI-30B-2R	R	ACTGCATCCTTGAGTTCTGC	425173	425192	20
POOL-2	TPI-30B-C	TPI-30B-3F	F	ATACTCCCTTGCCAGTGTGG	424682	424701	20	4229
		ES-80R	R	ACATGGACCGCCTTCCTCATA	428890	428910	21
POOL-2	TPI-31A-A	TPI-31A-AF-Bosnia	F	CAGCGTGAGATTGGGTTAGC	427830	427849	20	5469
		TPI-31A-AR-Bosnia	R	TGCCCCTTGTATTCTTCCAC	433279	433298	20
POOL-2	TPI-31A-B	TPI-31A-BF-Bosnia	F	TTGAGCACCGTATGAAGCAG	433013	433032	20	5395
		TPI-31A-BR-Bosnia	R	GGCGATGTAAATGGTCGAGT	438388	438407	20
POOL-2	TPI-31B-A1	TPI-31(B)newF	F	GTGCGTCAGGCGTTGTTGTTGGTTTTG	437958	437984	27	3110
		MexATP0414-0415R	R	AACGCACTCACCTCACCACT	441048	441067	20
POOL-2	TPI-31B-A2	MexATP0414-0415F	F	GTCGTAGTTCCTCGCGTAGC	440397	440416	20	2747
		SDTP0415-0416R	R	TATGGGGGACATCGTTTCTC	443124	443143	20
POOL-2	TPI-31B-B1	SDTP0415-0416L	F	TCTGTTGGTCGGTGATCGTA	442346	442365	20	3005
		SDTP0417R	R	CCCTCTGGGAATGGGTAAAG	445331	445350	20
POOL-2	TPI-31B-B2	SDTP0417L	F	CATCTGCGCCAGTCTTTGTA	444569	444588	20	3291
		ES-92R	R	ACTCAAACACCAACCCCCTCTC	447838	447859	22
POOL-2	TPI-32A-A	ES-91F	F	CACTTTCCTCCGAGGACGTGT	447397	447417	21	5274
		32A-A_newR	R	TCAAACTCGCCCCATCTATC	452651	452670	20
POOL-2	TPI-32A-B	32A-B_newF	F	GGATTGTGCGCTACGTTTCT	452548	452567	20	5504
		TPI-32(A)newR	R	GCGCCGCACGACGATCAAATGA	458030	458051	22
POOL-2	TPI-32B-A1 (AF1AR4)	TPI-32B-AF1-Bosnia	F	TGAGTTGCAGACGCTTTGTC	457148	457167	20	3806
		TPI-32B-AR4-Bosnia	R	GCAAAGATGCAAGGGACAGT	460934	460953	20
POOL-2	TPI-32B-F7R10	TPI-32B-F7	F	ACACTGCTGTTGAAATTAGC	460732	460751	20	1039
		TPI-32B-R10	R	CGTAACGGTGGACAATGCTC	461751	461770	20
POOL-2	TPI-32Brep (F1R1)	32Brep-F1	F	CGTTTGGTTTCCCCTTTGTC	461058	461077	20	481
		32Brep-R1	R	GTGGGATGGCTGCTTCGTATG	461518	461538	21
POOL-2	TPI-32B-B1 (BF1BR1)	TPI-32B-BF1-Bosnia	F	CTCGGTTTCCAACTCAGCTC	461538	461557	20	3459
		TPI-32B-BR1-Bosnia	R	ATTTGTGTCTTCGGGCAGTC	464977	464996	20
POOL-2	TPI-32B-C	TPI-32B-CF-Bosnia	F	TCAGGTCTCTGTGTGGATGC	464480	464499	20	4740
		TPI-32B-CR-Bosnia	R	TCACCTCCAATTCCCACATC	469200	469219	20
POOL-2	TPI-33A-A	TPI-33A-AF-Bosnia	F	GACAGCATGAACACCAATCG	468181	468200	20	6893
		TPI-33A-AR-Bosnia	R	GCTCCTCGTAACATGACACA	475054	475073	20
POOL-2	TPI-33A-B	TPI-33A-BF-Bosnia	F	CGCAGTTTGAAGATCAGCAG	474668	474687	20	5594
		TPI-33AR	R	GCCATCACGTATGTGCGATGGC	480240	480261	22
POOL-2	TPI-33B (FR1)	33B-F	F	TTCTACCGATGTGCGTTCTG	478327	478346	20	6489
		33B-R1	R	ATACGGGAAAGGACACGTTG	484796	484815	20
POOL-2	TPI-33C (F2R2)	33C-F2	F	GAGATTTTTGCCGTGCATTC	484363	484382	20	8527
		33C-R2	R	GCTGCCGTATTCTGTTCACC	492870	492889	20
POOL-2	TPI-34A	34A-F	F	CGGCTTCAATTTTTCTCAGC	492652	492671	20	3702
		34A-R	R	CTGATGACGACCAAACAACG	496334	496353	20
POOL-2	TPI-34 (F3R3)	34-F3	F	ACCGCTACAAAGAGGATAGG	495206	495225	20	4751
		34-R3	R	TCTACGCACAAAGAAAGAGC	499937	499956	20
POOL-2	TPI-34rep (F4R5)	34rep-F4	F	GTCTTGTGCACATTATTCAAG	497142	497162	21	772
		34rep-R5	R	CTTCGTGCAACATCGCTACG	497894	497913	20
POOL-2	TPI-34B (F2R1)	34B-F2	F	GTTGCTTCTTCGGTCTGGTC	498833	498852	20	4730
		34B-R1	R	AAGGATTTGCGTGGAACTTG	503543	503562	20
POOL-2	TPI-36A	TPI-36-AF-Bosnia	F	TCGAGCAGCAGGGTAATCTC	501154	501173	20	3719
		TPI-36-AR-Bosnia	R	CTACGCAGCGAAAACAGTGA	504853	504872	20
POOL-2	TPI-36B	TPI-36-BF-Bosnia	F	CGTGGTCTCAAGCGGTAGTT	504398	504417	20	4015
		TPI-36-BR-Bosnia	R	GCTTGCTATGCACCACTTGA	508393	508412	20
POOL-3	TPI-37	ES-167R	F	CCTGCAGGGTACGTAAGTAGAGGAC	507390	507414	25	7040
		ES-146R	R	CGCTTTGATGAGGGAATAGAAGAC	514406	514429	24
POOL-3	TPI-38A-1	ES-97F	F	TGACCCAATGAAATGACCCTTC	513763	513784	22	2827
		TPI-38A-1R	R	TCGCCATAGTCCTAGAAACG	516570	516589	20
POOL-3	TPI-38A-2_new	38A-2_newF	F	GCAATGAACCAGACAAGCAA	516466	516485	20	3779
		38A-2_newR	R	CGCACTGACACGCTAAACAG	520225	520244	20
POOL-3	TPI-38A-3	TPI-38A-3F	F	CGGAGTAAACGGTGTTTCGT	519894	519913	20	4345
		TPI-38AF	R	GGATCAAAGGCAGGATTGAA	524219	524238	20
POOL-3	TPI-38B-A	TPI-38BR	F	CCACCTCCTGTTTACGCATT	524167	524186	20	4487
		TPI-38B-1R	R	AACAGGAAAGCAACTTGTCG	528634	528653	20
POOL-3	TPI-38B-B	TPI-38B-2F	F	ATGGCGTTGAGACAGAAGAG	527994	528013	20	3984
		TPI38B-2R	R	ACAATCCCTCTTCCTTCCAC	531958	531977	20
POOL-3	TPI-38B-C	TPI-38B-3F	F	CGCTGGCAGAGTGTTATGAA	531545	531564	20	4675
		ES-100R	R	CAGCATGGTCAGAAGCAATAGGTAG	536195	536219	25
POOL-3	TPI-39A-A	ES-106F	F	GGCAGGGTTACATGCTTGTCTC	535637	535658	22	4356
		39A-A_newR	R	GGACTGCATTGGCTTTTGTT	539973	539992	20
POOL-3	TPI-39A-B	39A-B_newF	F	ACTGAACGAACACCCCTCTG	539749	539768	20	4113
		39A-B_newR	R	ACATCTGCTCCAAAGCCAAC	543842	543861	20
POOL-3	TPI-39A-C	39A-C_newF	F	GTGGCAGGTAGGTCTTTGGA	543335	543354	20	4269
		TPI-39AR	R	CGACACAACTGGGTTTTCCT	547584	547603	20
POOL-3	TPI-39B-A	TPI-39B-AF-Bosnia	F	TTGGAGTGTTGTTGCCAGAC	544719	544738	20	6324
		TPI-39B-AR-Bosnia	R	GAAATGCGCTCGTGTAAGTG	551023	551042	20
POOL-3	TPI-39B-B	TPI-39B-BF-Bosnia	F	AGAAGGACAGCGTCGGTATG	550611	550630	20	6140
		TPI-39B-BR-Bosnia	R	TTTTGCCCCTATGATTGCAG	556731	556750	20
POOL-3	TPI-40A	TPI-40-AF-Bosnia	F	CGAACCTACTACCGGATTGC	553077	553096	20	5961
		TPI-40-AR-Bosnia	R	GCCCGATTTTGTTATTGGAG	559018	559037	20
POOL-3	TPI-40B	TPI-40-BF-Bosnia	F	CCAAAGCAATATCCCAGTCC	558762	558781	20	5239
		TPI-40-BR-Bosnia	R	GCGCGTGTTCTTTCATGTAG	563981	564000	20
POOL-3	TPI-40C	TPI-40-CF-Bosnia	F	ATCTTGAGCACGAAGGATGC	563653	563672	20	6451
		TPI-40-CR-Bosnia	R	CTTTGCGTAGGGTGCTCTTC	570084	570103	20
POOL-3	TPI-40D	TPI-40-DF-Bosnia	F	CAGCCCGCTAATCTTTTCAG	569532	569551	20	4959
		TPI-40-DR-Bosnia	R	GGTCCTTGCTCGTCTACTCG	574471	574490	20
POOL-3	TPI-41A-A	ES-82R	F	TCACCACCTTTGACAGTACCCC	571737	571758	22	4663
		41A-A_newR	R	CGACTCCTTTCGTTGCTTTC	576380	576399	20
POOL-3	TPI-41A-B	41A-B_newF	F	TTGGAGAAAAATCCCGACAC	575716	575735	20	4635
		TPI-41AR	R	GATCACGTATGTGCGTCCAC	580331	580350	20
POOL-3	TPI-41B-A	TPI-41B-AF-Bosnia	F	CACACAGGCTCATACGCAAC	579299	579318	20	3808
		TPI-41B-AR-Bosnia	R	GCTGCGGTCTACCTTCACTC	583087	583106	20
POOL-3	TPI-41B-B	TPI-41B-BF-Bosnia	F	TGGATGTCCTTCACAATTCG	582574	582593	20	5425
		TPI-41B-BR-Bosnia	R	ACAGTCGGGTGAAAGGACAG	587979	587998	20
POOL-3	TPI-41B-C	TPI-41B-CF-Bosnia	F	TTCTGCCGTACCGAATACTG	587619	587638	20	5563
		TPI-41B-CR-Bosnia	R	ATGTGCTCTGGCTGAAGGAG	593162	593181	20
POOL-3	TPI-42A-A	TPI-42AF	F	GTTCTGCCATGCGCACCGCCATACG	591445	591469	25	5431
		42A-A_newR	R	GGATTTTGGACGGAAAGACA	596856	596875	20
POOL-3	TPI-42A-B	42A-B_newF	F	ATGATTTACCCGCATTTGGA	596342	596361	20	5230
		TPI-42AR	R	TGGCGGCTACCTTCGCAGAACTTGC	601547	601571	25
POOL-3	TPI-42B-A	TPI-42BF	F	TGCAAAGCAAATATCGCAATGAGC	601025	601048	24	5529
		42B-A_newR	R	TGAGGCAGGGGTGTATCAAG	606534	606553	20
POOL-3	TPI-42B-B	42B-B_newF	F	ACCAAAACACCCAGTGCTTC	606191	606210	20	6038
		TPI-42BR2	R	ACATCATTGCAAGCATTATCCG	612207	612228	22
POOL-3	TPI-43A	ES-88R	F	GGATGGAAAATTCGTTGTACCCT	611593	611615	23	5578
		TPI-43AF	R	GCGTTTTCCTGTTGATTGGT	617151	617170	20
POOL-3	TPI-43D	TPI-43DF	F	ACGGTACAACGGAGAAATCG	616200	616219	20	3993
		TPI-43DR	R	CTGCTCGGTTAGGACTGGAC	620173	620192	20
POOL-3	TPI-43B	TPI-43BR	F	TACCGTCCATCTGTCCACAA	619214	619233	20	5301
		TPI-43BF	R	AGTTTTTCCCCCACTGCTTT	624495	624514	20
POOL-3	TPI-43C	TPI-43CR	F	ATGCCCTCTCTGCTACCTCA	624061	624080	20	7841
		ES-89F	R	CAAGCGCAGTAAAATCCCTCAG	631880	631901	22
POOL-3	TPI-44A-A	ES-143R	F	GCGTTTTTCCTGTTCTCCCTCT	631372	631393	22	4908
		44A-A_newR	R	TCGTGCGGGAAATAAATAGC	636260	636279	20
POOL-3	TPI-44A-B	44A-B_newF2	F	CAACAAATGCAAGCAGATCG	635944	635963	20	2585
		44A-B_newR	R	ACTGGGGCATTGTGTTTGTT	638509	638528	20
POOL-3	TPI-44B-A	TPI-44B-AF-Bosnia	F	GAGAACCCATCCCTCTTGTG	638322	638341	20	3294
		TPI-44B-AR-Bosnia	R	CGTCTCATGCGTGTTCTCTC	641596	641615	20
POOL-3	TPI-44B-B	TPI-44B-BF-Bosnia	F	GATAGAACCGACCCCGTACA	641316	641335	20	6839
		TPI-44B-BR-Bosnia	R	CATTGAAGTGCTCGGTGATG	648135	648154	20
POOL-3	TPI-44B-C	TPI-44B-CF-Bosnia	F	AGCCTGATCTAGCACCCTCA	647880	647899	20	4232
		TPI-44B-CR-Bosnia	R	ATTGACTGTGCTGCGTTCAG	652092	652111	20
POOL-3	TPI-45A	TPI-45-AF-Bosnia	F	AGGATCGGAATGGGGAGTAG	651728	651747	20	4223
		TPI-45-AR-Bosnia	R	TTGGGATAAAACGCTCCTTG	655931	655950	20
POOL-3	TPI-45B	TPI-45-BF-Bosnia	F	GCCTCTTCTGCTGCTTTCAG	655681	655700	20	4771
		TPI-45-BR-Bosnia	R	TAGGGCCGAAGGTGTAGATG	660432	660451	20
POOL-3	TPI-46A	46A_newF	F	ACACCGATCATTACCGCTTC	660217	660236	20	3100
		46A_newR	R	TAGTCATTCCGCACACGAAG	663297	663316	20
POOL-3	TPI-46B	46B_newF	F	TGTGGAAACTCCCTGACACC	662987	663006	20	3595
		46B_newR	R	CGTCTTTTACCACCCCACAG	666562	666581	20
POOL-3	TPI-47	ES-171F	F	GCATAACCGCGTGCTATACGA	666106	666126	21	2003
		ES-172R	R	AGCGCCTCTACATCCTCCATG	668088	668108	21
POOL-3	TPI-48-1	48-1F	F	ACTGTGTGCAGCGATTGAGTATTG	667779	667802	24	3928
		48-1R	R	CATGCTGCTAACCTGGCTTGAG	671685	671706	22
POOL-3	TPI-48-2	48-2F	F	GCACGGATGTATGCGGTGTAAG	671288	671309	22	4017
		48-2R	R	CTGGATACCTTGATTGGGCAGTAG	675281	675304	24
POOL-3	TPI-48-3	48-3F	F	TCCCTGGAAGAGGTTATTTGAGAGG	674271	674295	25	4247
		48-3R	R	ACTGCATGCTCTTTCTGATCCATTAC	678492	678517	26
POOL-3	TPI-49A	ES-34R	F	GCCACTCACCTGAAGATTGGAC	678390	678411	22	5018
		49A_newR	R	GTACCCGCTTCTCTTTGCAG	683388	683407	20
POOL-3	TPI-49B	49A_newF	F	AGTGCGAACAAGATGCACAG	683086	683105	20	5520
		ES-31F	R	TCGAAGCGAACCATTTTCCTAAT	688583	688605	23
POOL-3	TPI-50A-A	ES-68R	F	TGGTTCGCTTCGATTATCATAACTTAA	688593	688619	27	4554
		50A-A_newR	R	ATCGGAGTGCAACAACTTCC	693127	693146	20
POOL-3	TPI-50A-B	50A-B_newF	F	AGGCATTTCTCGTCCAACAC	692658	692677	20	4355
		50A-B_newR	R	ATGGTTCTGGTGGATGTGGT	696993	697012	20
POOL-3	TPI-50A-C_new	50A-C_newF2	F	GTGCTGCCTCACAAAGATGA	696878	696897	20	1746
		50A-C_newR2	R	AGGTGCGGGTTTCTCTAGGT	698604	698623	20
POOL-3	TPI-50B-A	TPI-50B-AF-Bosnia	F	TCTGCACCACTCCTTGTACG	698401	698420	20	5561
		TPI-50B-AR-Bosnia	R	GTCGCCATAAGAACCTCAGC	703942	703961	20
POOL-3	TPI-50B-B	TPI-50B-BF-Bosnia	F	CGAGTGTCGTGAACCTTGAG	703604	703623	20	5643
		TPI-50B-BR-Bosnia	R	TGTGCCATTTCTCACTCCTG	709227	709246	20
POOL-3	TPI-52A-A	ES-67R	F	AGTCATTGCGTTTTTCTCGGG	708207	708227	21	4512
		52A-A_newR	R	TCAAGAGATGTTGCGTTTGC	712699	712718	20
POOL-3	TPI-52A-B1	SDTP0648-0649L	F	CAAAGCGAGCATCTACGTCA	711454	711473	20	4270
		SDTP0651-0652R	R	GGTCTGTCGCACTCCTTCTC	715704	715723	20
POOL-3	TPI-52A-B3	SDTP0651-0652L	F	AACGTGTCATCGTCAAGCTG	715022	715041	20	5227
		SDTP0655-0658R	R	GCAGTGCAGGTTCCGTTTAT	720229	720248	20
POOL-3	TPI-52B	TP-52BF	F	ACCGTTTTCCAGTCGTATGC	715964	715983	20	7399
		ES-170R	R	GGTCAGATAGGACAAGGGGTCAC	723340	723362	23
POOL-3	TPI-53A	ES-23R	F	CATGACCGTTTCAAAGGGCTC	721173	721193	21	6093
		TP-53AR	R	GCAACCTCTCCTGTCAAAGC	727246	727265	20
POOL-3	TPI-53B-A_new	53B-A_F_Pa	F	GATGACATGTCTGATGCCTGGT	726975	726996	22	5001
		53B-A_R_Pa	R	TTTGCTGAGCGTGCAGAGAAAC	731954	731975	22
POOL-3	TPI-53B-B	53B-B_newF	F	TGCAGTTTGATAGGCAACCA	731838	731857	20	5678
		ES-22F	R	CAGTTTGCTCTACCTGCGTCCT	737494	737515	22
POOL-3	TPI-54A-A1	TPI-54A-AF-Bosnia	F	GTAATGAGATTCGCCGGAAC	736349	736368	20	4530
		54A-A1_newR	R	AAGGGAAGAGAGCGTTGGAG	740859	740878	20
POOL-3	TPI-54A-A2	54A-A2_newF	F	GAGGCGTACCTTCTCCATCC	740120	740139	20	4239
		TPI-54A-AR_new	R	AAAGGGCATCGGTATGATGT	744339	744358	20
POOL-3	TPI-54A-B	TPI-54A-BF-Bosnia	F	ATGCTTCCAGTCCGCTACAG	744107	744126	20	6754
		TPI-54A-BR-Bosnia	R	GGCTCATCAAGCAAGAGGAC	750841	750860	20
POOL-3	TPI-54B-A	TPI-54B-AF-Bosnia	F	CCGAGGAACGTAAGCTCAAC	750596	750615	20	6095
		TPI-54B-AR-Bosnia	R	ATTATCTCATGCGCCGTACC	756671	756690	20
POOL-3	TPI-54B-B	TPI-54B-BF-Bosnia	F	AAAGCAGTCCGTACATCACG	756318	756337	20	5606
		TPI-54B-BR-Bosnia	R	ATACGCGAGGAAGAGCTACG	761904	761923	20
POOL-4	TPI-55A	TPI-55-AF-Bosnia	F	TCGATAAAGGCTGCGATACC	759633	759652	20	4843
		TPI-55-AR-Bosnia	R	AGCACTCTCGCATTGTGTTG	764456	764475	20
POOL-4	TPI-55B	TPI-55-BF-Bosnia	F	ACCAGGCACCACGCTACTAC	764373	764392	20	4617
		TPI-55-BR-Bosnia	R	CAGCTATTGCACCGTATGGA	768970	768989	20
POOL-4	TPI-55C	TPI-55-CF-Bosnia	F	AAACCGCGTCAACTACATCC	768647	768666	20	5604
		TPI-55-CR-Bosnia	R	GAGAAAAGCGGGAGGTAGTG	774231	774250	20
POOL-4	TPI-56A	ES-15R	F	CCATCGTTACCGTTTTCTCTAGCA	771591	771614	24	7720
		TPI-56AF	R	TTCGCAGGATATTTGGAAGG	779291	779310	20
POOL-4	TPI-56D	TPI-56DF	F	CAGATAAGGAGGCGCTTGAG	778345	778364	20	2391
		TPI-56DR	R	AACTGGTATTCAGCCACGAG	780716	780735	20
POOL-4	TPI-56B	TPI-56BR	F	CGTTGCAATATTCGTCTTTCC	780020	780040	21	1017
		TPI-56BF	R	TAGCACAGGAGTTGCAGTCG	781017	781036	20
POOL-4	TPI-56C	TPI-56CR	F	ACCGCACGAAAGTATTCCAC	780490	780509	20	8562
		ES-14F	R	TGAAAATTCAGTAATGGAAGGGGTC	789027	789051	25
POOL-4	TPI-57A-A	TPI-57A-AF-Bosnia	F	AAACATGCACCGAAAGGAAC	787365	787384	20	7043
		TPI-57A-AR-Bosnia	R	CCGAGGATTTGCTACCACTC	794388	794407	20
POOL-4	TPI-57A-B	TPI-57A-BF-Bosnia	F	TTATTCTCCGACAGGGCAAG	794231	794250	20	6465
		TPI-57A-BR-Bosnia	R	CCTGCCGAAAGAAGTGGTAG	800676	800695	20
POOL-4	TPI-57B/58-1	TPI-57BF	F	TGCCCATTTCATCAGCAACC	799350	799369	20	4611
		57B/58-1_newR	R	GGTGCTGGACTTTGGGTCTA	803941	803960	20
POOL-4	TPI-57B/58-2	57B/58-2_newF	F	GGAAGTTTGGAAGTGCAAGG	803429	803448	20	5427
		57B/58-2_newR	R	CGTGAGGTGTTGATGATTGG	808836	808855	20
POOL-4	TPI-57B/58-3	57B/58-3_newF	F	TCCGCAGTGAAACACAAGAG	808395	808414	20	4780
		57B/58-3_newR	R	GCCTTTGCTTCGTTTAGTCG	813155	813174	20
POOL-4	TPI-57B/58-4	57B/58-4_newF	F	TCGATGAGTAGCACCGACAG	812617	812636	20	4989
		57B/58-4_newR	R	GCTCTCGCTCTTTGCTCAGT	817586	817605	20
POOL-4	TPI-57B/58-5	57B/58-5_newF	F	GCTTTGCGGATACCTCTCTG	817182	817201	20	5025
		ES-8F	R	CGCTGCACTGTACCACAAGTAGAC	822183	822206	24
POOL-4	TPI-59A	TPI-59-AF-Bosnia	F	AGAACTCCATCGCCTGTCTG	820430	820449	20	4352
		TPI-59-AR-Bosnia	R	TCCTGGGCTGGTAAGAAATG	824762	824781	20
POOL-4	TPI-59B	TPI-59-BF-Bosnia	F	TGACACTTCCAAACGAGCAG	824343	824362	20	5794
		TPI-59-BR-Bosnia	R	TGTCGGTTCCCCTTACTTTG	830117	830136	20
POOL-4	TPI-59C-2	TPI-59-CF-Bosnia-new	F	CCTGAGCGTAAAGGAACAGC	828342	828361	20	2870
		TPI-59-CR-Bosnia-new	R	TGCAACTGAAAGGCACAGAG	831192	831211	20
POOL-4	TPI-59D-A	TPI-59-DF-Bosnia-new	F	GAAAGACACGGCACTCTTCC	831129	831148	20	3704
		TPI-59D-inner-R-Bosnia	R	TGCGTTGTGTTAAGCCTGTC	834813	834832	20
POOL-4	TPI-59D-B	TPI-59D-inner-F-Bosnia	F	CGGAAGAATCGTGGAAGAAG	834328	834347	20	2805
		TPI-59-DR-Bosnia-new	R	AGCGATACCCTGTGATCCTG	837113	837132	20
POOL-4	TPI-60A	TPI-60-AF-Bosnia	F	CCTTCATGGGAAGCTACGAG	836696	836715	20	5954
		TPI-60-AR-Bosnia	R	ATGGAATGCTTGCGAAGAAG	842630	842649	20
POOL-4	TPI-60B	TPI-60-BF-Bosnia	F	GACTTGCTATCGGGTTGGAG	842190	842209	20	5827
		TPI-60-BR-Bosnia	R	CTAGCACTGGTTGTGCAGGA	847997	848016	20
POOL-4	TPI-60C	TPI-60-CF-Bosnia	F	ACACCGCATCAGCACTAGAC	847692	847711	20	4981
		TPI-60-CR-Bosnia	R	GTACGTTGTGGTCCGTGATG	852653	852672	20
POOL-4	TPI-60D	TPI-60-DF-Bosnia	F	AATGGAGCAGGCAAATCAGT	852192	852211	20	5745
		TPI-60-DR-Bosnia	R	GCAAATCGGAGGTAGAATCC	857917	857936	20
POOL-4	TPI-61A	TPI-61-AF-Bosnia	F	CTCCGTGGAAAGCTAAGACG	857744	857763	20	6818
		TPI-61-AR-Bosnia	R	TTTCTGAGCGCGTTGTACTG	864542	864561	20
POOL-4	TPI-61B-2A	TPI-61B-BF-Bosnia-new	F	TATGCAGCGCAAGACATACC	863716	863735	20	4245
		TPI-61B-inner-R-Bosnia	R	CTGATAGCCGTGCGTACATC	867941	867960	20
POOL-4	TPI-61B-2B	TPI-61B-inner-F-Bosnia	F	ACTCGCAGGTATGAACATCG	867373	867392	20	3538
		TPI-61B-BR-Bosnia-new	R	TGCGTATATGAACGGACTGC	870891	870910	20
POOL-4	TPI-61C	TPI-61-CF-Bosnia	F	GTCTTTCCCACACCAGCTTC	870009	870028	20	5200
		TPI-61-CR-Bosnia	R	AGCAGTTTACGCCCTTTCTG	875189	875208	20
POOL-4	TPI-62A-A1	TPI-62A-AF-Bosnia-new	F	AATCTGTGCGTGCTTGAGTG	874933	874952	20	4387
		TPI-62A-AR-Bosnia-new	R	ACTGAAGGTGCCAAGGTACG	879300	879319	20
POOL-4	TPI-62A-A2	TPI-62A-BF-Bosnia-new	F	CGTTCGTGACCGTGTAGAAG	878884	878903	20	4678
		TPI-62A-BR-Bosnia-new	R	GCACCATCCGAAGTAGCAGT	883542	883561	20
POOL-4	TPI-62A-B	TPI-62A-BF-Bosnia	F	TGATTGAGAGCAAGGCACAC	882781	882800	20	6565
		TPI-62A-BR-Bosnia	R	ACGTATCGGCATGTGAGTGA	889326	889345	20
POOL-4	TPI-62B-A	TPI-62B-AF-Bosnia	F	CCCTTGTAGCGTTCCTTCAG	888915	888934	20	6975
		TPI-62B-AR-Bosnia	R	ACCAGCAATGGTACGACCTC	895870	895889	20
POOL-4	TPI-62B-B	TPI-62B-BF-Bosnia	F	GGAGGCACGCATATACAGGT	895666	895685	20	5850
		TPI-62B-BR-Bosnia	R	TGACCTTTCCGCTCATTACC	901496	901515	20
POOL-4	TPI-63A	TPI-63-AF-Bosnia	F	ATGCACACTTATCGCCACAC	901189	901208	20	8392
		TPI-63-AR-Bosnia	R	ATGGAGTCATTGGAGCGAAC	909561	909580	20
POOL-4	TPI-63B	TPI-63-BF-Bosnia	F	TCATCGAGCAAAAGCACATC	909127	909146	20	8074
		TPI-63-BR-Bosnia	R	TCGAACTCATGCTCGTTCAC	917181	917200	20
POOL-4	TPI-64A_new	64A_newF	F	GCGCTACTTTGCCTATCAGC	916874	916893	20	3052
		64A_newR	R	CGATGAAGGGGATAAGGTGA	919906	919925	20
POOL-4	TPI-64B	TPI-64-BF-Bosnia	F	TGGACATAGACCGACCTTCC	919768	919787	20	5003
		TPI-64-BR-Bosnia	R	AATAAGCACGGAGTGGGAAC	924751	924770	20
POOL-4	TPI-65A-A	65A-F2	F	CAATGGGAAGACCAGAGGAG	924113	924132	20	4545
		65A-A_newR	R	ACCGTCTCATCACTCCCAAC	928638	928657	20
POOL-4	TPI-65A-B	65A-B_newF	F	CGAATCCCGAGGAAATACAA	928308	928327	20	4655
		65A-R1	R	AGAATCCATCAACGCTCTGC	932943	932962	20
POOL-4	TPI-65B	TPI-65B-F2-Bosnia	F	GTCGGCAAGGTACTCATCGT	932474	932493	20	5324
		TPI-65B-R-Bosnia	R	TGCTTGAGTGTGAGGCAGAC	937778	937797	20
POOL-4	TPI-66A-A	TPI-66A-AF-Bosnia	F	ATGTCAGTCCCCTTGAGCAG	937317	937336	20	4934
		TPI-66A-AR-Bosnia	R	CATGCACACGGTACAAAAGG	942231	942250	20
POOL-4	TPI-66A-B	TPI-66A-BF-Bosnia	F	TTTGCCTGAAAAGGGATCTG	942001	942020	20	4803
		TPI-66A-BR-Bosnia	R	TTGGATATGAAGGCGAGGTC	946784	946803	20
POOL-4	TPI-66A-C	TPI-66A-CF-Bosnia	F	TCTGCCTCATTTTCCTTTGG	946356	946375	20	5673
		TPI-66A-CR-Bosnia	R	AAATCAGCGATGTCCGAGAG	952009	952028	20
POOL-4	TPI-66B-1	66B-1_F_Pa	F	TGGATACCGACGTCACCCTTAATC	951803	951826	24	2009
		66B-1_R_Pa	R	TCAAGTCCTGAGCCGAGAATG	953791	953811	21
POOL-4	TPI-66B-2	66B-2_newF	F	ATGGAAAGCCAGGACAACAC	953488	953507	20	4681
		66B-2_newR	R	TGCTGTGGTGTTTTCTACGC	958149	958168	20
POOL-4	TPI-66B-3	66B-3_F_Pa	F	CGCTGCTATTTGCGCTCTATTTCC	958054	958077	24	4202
		66B-3_R_Pa	R	GGCTGCGTAACAACCTTGAACTG	962233	962255	23
POOL-4	TPI-67A-A	ES-130F	F	TGTGTGAGATTCAAATCCCAAGG	962044	962066	23	4797
		67A-A_newR	R	GTTGTTCGGCAGGCTTCTAC	966821	966840	20
POOL-4	TPI-67A-B	67A-B_newF	F	TAATCTCACGCACCGTCAAG	966559	966578	20	5165
		TPI-67-R1	R	GTCTCGGAAGTGGATTTGTC	971704	971723	20
POOL-4	TPI-67B-A	67B-F	F	GCAGGCTTACCAGCACCTAC	969687	969706	20	4229
		67B-A_newR	R	AGCCCACAAACAGAACTTGG	973896	973915	20
POOL-4	TPI-67B-B	67B-B_newF	F	TGGTCGGATAGGAATTTTCG	973468	973487	20	4410
		67B-R	R	AGTTTCGGGTGATTGGAGTG	977858	977877	20
POOL-4	TPI-67C-A	67C-F	F	AGTACCCCGCTGACAATCAC	976755	976774	20	4908
		67C-A_newR	R	TATGTGGAGCGTGAGTTTCG	981643	981662	20
POOL-4	TPI-67C-B	67C-B_newF	F	TCTGCTTCCATGAACGAATG	981419	981438	20	4178
		67C-R	R	CAGCAGTGTATCGTGCGTTC	985577	985596	20
POOL-4	TPI-68A-A	TPI-68A-AF-Bosnia	F	CATCTACCTTTCCGCTGCTC	985152	985171	20	3224
		TPI-68A-AR-Bosnia	R	AGAGATTCATGGCGGATGAC	988356	988375	20
POOL-4	TPI-68A-B	TPI-68A-BF-Bosnia	F	GCGACGGGATCATTCACTAC	987970	987989	20	6732
		TPI-68A-BR-Bosnia	R	GTATCCACCACAGGGAGTGC	994682	994701	20
POOL-4	TPI-68A-C_new	68A-C_newF	F	GCTTTTCTCGCCACCATTAC	994217	994236	20	2636
		68A-C_newR	R	CGTGCATGTTCCGTAGAAGA	996833	996852	20
POOL-4	TPI-68B-A	68B-F	F	TCGCTTTCTACCTCCTCCAG	996354	996373	20	4701
		68B-A_newR	R	CGCGTCCGTAGTAGTCATCA	1001035	1001054	20
POOL-4	TPI-68B-B	68B-B_newF	F	GCGCAGTACGTGTTTCAGTC	1000883	1000902	20	5214
		68B-R	R	GCTTCTTCACTGGGATCGTC	1006077	1006096	20
POOL-4	TPI-68C-A	68C-F	F	GCTGCATCGTAGAGGGTTTG	1005757	1005776	20	4491
		68C-A_newR	R	TGAAGCCGTTTTGTGTCTTG	1010228	1010247	20
POOL-4	TPI-68C-B	68C-B_newF	F	TGCTAAACACGGCAAAGATG	1010024	1010043	20	4001
		68C-R	R	AGTACGTCCAGCCAATCCAG	1014005	1014024	20
POOL-4	TPI69A-A	ES-134F	F	CCATCAGCACAAAGGGTGTGT	1007905	1007925	21	4426
		69A-A_newR	R	TGGGAAGCGTATCTGCCTAC	1012311	1012330	20
POOL-4	TPI69A-B	69A-B_newF	F	CGCAGACATAGAACGCATGT	1011534	1011553	20	4558
		TPI-69AF	R	GTGCGTTGCACCCCTATACT	1016072	1016091	20
POOL-4	TPI-69B	TPI-69BR	F	CTGGGGTGTTCACTGACCTT	1015866	1015885	20	6792
		TPI-69BF	R	GTCAGGCGGTGTTCTATGGT	1022638	1022657	20
POOL-4	TPI-69C	TPI-69CR	F	CTCAGCTTCCGGCAAGATAC	1022179	1022198	20	4101
		TPI-69CF	R	GCTCACGAAGGAGGAGTACG	1026260	1026279	20
POOL-4	TPI-69D	TPI-69DR	F	GCACACCCCAACTGCTTAAT	1025521	1025540	20	7142
		ES-137R	R	CAGAGTGGACCCTCGTGTTCTTAG	1032639	1032662	24
POOL-4	TPI-70A	ES-136F	F	CCATACACATCCATGTACTCGCAC	1031892	1031915	24	7551
		TPI-70AR	R	AACGCGGTGCATCGGTCTGTCCAC	1039419	1039442	24
POOL-4	TPI-70B	TPI-70BF	F	AAGCCGGGGTCTCCATCGTCCATCTT	1038942	1038967	26	7252
		ES-157F	R	AGTATTTTGCGCGTAGGCGTC	1046173	1046193	21
POOL-4	TPI-71A-3	ES-158R	F	GCCATAGGAAACCGTAAGACCG	1045435	1045456	22	4489
		TPI-71-R20	R	CGGGATTTTATCATCTCTGC	1049904	1049923	20
POOL-4	TPI-71A-7	TPI-71-F15	F	GTAAAGCGGGTGTCAAGACG	1049691	1049710	20	801
		TPI-71-F11rc-Luis	R	CCAGTACGATAAGCAGCGG	1050473	1050491	19
POOL-4	TPI-71A-6	TPI-71A-F17	F	GCTGCGTTACCGTCATACC	1050325	1050343	19	3872
		TPI71-AR2	R	GTTCTGGAGCGAGCCATTAG	1054177	1054196	20
POOL-4	TPI-71B	TP-71BF	F	CAAGCGCCAGAAGATACTCC	1052540	1052559	20	5178
		ES-139R	R	CGAGGATTTTGAGCATGCCTAG	1057696	1057717	22
POOL-4	TPI-72A-A	ES-138F	F	CGTAAGTGATCGCATGTCCCTC	1056837	1056858	22	4195
		72A-A_newR	R	CCAGAGTCCTACGGCAGTTC	1061012	1061031	20
POOL-4	TPI-72A-B	72A-B_F	F	CTCCTGTGATGTCGCTCTCA	1060680	1060699	20	4242
		72A-B_R	R	AGATCGCCACACAGATGACC	1064902	1064921	20
POOL-4	TPI-72B-A	TP-72BF	F	GCAACCTTCGCTCTTTGTTC	1064583	1064602	20	4118
		72B-A_newR	R	CACGGGTTCTTTTGTCTGGT	1068681	1068700	20
POOL-4	TPI-72B-B	72B-B_newF	F	GAGCCATGTATCCTCCCAGA	1068552	1068571	20	4574
		ES-155F	R	CGTTTGAGCACGAAGGGTACC	1073105	1073125	21
POOL-4	TPI-73A	TPI-73-AF-Bosnia	F	GCTGCTCATTCTTTCCATCC	1072506	1072525	20	5532
		TPI-73-AR-Bosnia	R	ACGGCAAAAAGGTAATCGTG	1078018	1078037	20
POOL-4	TPI-73B	TPI-73-BF-Bosnia	F	ACCGACTTCATCCCTGACAC	1077491	1077510	20	5935
		TPI-73-BR-Bosnia	R	ACGATCAGCGACGAGGTTAG	1083406	1083425	20
POOL-4	TPI-74A-A	TPI-74A-AF-Bosnia	F	TCTTTCGCTGCATGTGCTAC	1082842	1082861	20	4093
		TPI-74A-AR-Bosnia	R	GATAGGAGAGAGGGCCATGA	1086915	1086934	20
POOL-4	TPI-74A-B	TPI-74A-BF-Bosnia	F	TTGCCTTCCCACTCTTGTTC	1086303	1086322	20	6851
		TPI-74A-BR-Bosnia	R	ACCGGCGATTGAAGAAGTAG	1093134	1093153	20
POOL-4	TPI-74A-C	TPI-74A-CF-Bosnia	F	CATACAAGGCGGTGGTATCC	1092699	1092718	20	3874
		TPI-74A-CR-Bosnia	R	TGGAGTTTCTGTGGTCAACG	1096553	1096572	20
POOL-4	TPI-74B-A	TPI-74B-AF-Bosnia	F	CACTCCCCGCTTCTCTACTG	1096449	1096468	20	4987
		TPI-74B-AR-Bosnia	R	TCAGAGGTTGCGTACTGCTG	1101416	1101435	20
POOL-4	TPI-74B-B	TPI-74B-BF-Bosnia	F	CTACTTCGGGCAAACGACTC	1100807	1100826	20	3599
		TPI-74B-BR-Bosnia	R	GGTGCTCCTCTCCATCAATC	1104386	1104405	20
POOL-4	TPI-74B-C	TPI-74B-CF-Bosnia	F	CGTCATTGCTGTTGGTTCTG	1104296	1104315	20	4129
		ES-126F	R	CACAGCGAGTATTTAAGGGTGGG	1108402	1108424	23
POOL-4	TPI-75A	ES-127R	F	TTCTTGCCTTAATCTGTCCGAGC	1107726	1107748	23	7310
		TPI-75AF	R	TGGTGCGTCTTTCTTCTCCT	1115016	1115035	20
POOL-4	TPI-75B-A	TPI-75BR	F	ACAAAGGGCAAGAACACCAC	1114098	1114117	20	4658
		TPI-75B-1R	R	CGATTTTCTTCTGCGAGGTC	1118736	1118755	20
POOL-4	TPI-75B-B	TPI-75B-2F	F	GCCACACATGGACATACTCG	1118378	1118397	20	3930
		ES-124F	R	CACCTATCTTTGTGTGGTAGGGGA	1122284	1122307	24
POOL-4	TPI-76A	ES-125R	F	ATACCATTCTTCCAGCCCCGT	1121473	1121493	21	1778
		ES-175R	R	CACCCTGACGGTGAGTCACTCA	1123229	1123250	22
POOL-4	TPI-76B	76B-F	F	GGTAAAGGTTACTGCCAGAATCTGCTC	1122859	1122885	27	999
		76B-R	R	ACCGCATTATGAGCGCACGAAAC	1123835	1123857	23
POOL-4	TPI-77 (TP1030)	TP1030-XL-F2	F	GTATGAGCGCATGGAGAAGG	1123649	1123668	20	2384
		TP1030-XL-R2	R	GAACGGCGTCTTTCTGTACG	1126013	1126032	20
POOL-4	TPI-78 (F1R1)	TPI-78-F1-Bosnia	F	CAATCTGCTACGCGAAAAGG	1125709	1125728	20	3006
		TPI-78-R1-Bosnia	R	GGACAGGGTTTGAGCTGTTC	1128695	1128714	20
POOL-4	TPI-80	ES-165R	F	CTCAATGTGCTGTTTGTAGTCGGA	1128216	1128239	24	7949
		ES-153F	R	ACACTCCTCCTGCCTTGGAGAA	1136143	1136164	22
a Altogether, 278 pairs of specific primers were used for amplification of treponemal DNA to obtain overlapping PCR products (TP intervals) covering the entire genomes of both strains. TP intervals were mixed in equimolar
amounts into four distinct pools: Pool-1, Pool-2, Pool-3, and Pool-4 (TP intervals 11A and 25A were mixed into the Pool-4). Prior to Illumina sequencing, the PCR products from each pool were labeled with multiplex
identifier adapters and sequenced as four different samples.
b Primer coordinates, primer sequence, primer length, and TP interval size according to the Nichols strain (Fraser et al. 1998; GenBank Acc. No. AE000520.1)
