# Supplementary material for: Complete genome sequences of two strains of Treponema pallidum subsp. pertenue from Ghana, Africa: Identical genome sequences in samples isolated more than 7 years apart
Source: PLoS Negl Trop Dis. 2017 Sep 8;11(9):e0005894. doi: 10.1371/journal.pntd.0005894 (PMC5607219; doi:10.1371/journal.pntd.0005894)
Supplement: S2 Table — Illumina sequencing reads were mapped to the Samoa D reference genome (CP002374.1). (XLS) [file pntd.0005894.s002.xls]

## Sheet: List4
Table S2: Genome coverage statistics for TPE CDC 2575 and Ghana-051 strains. Illumina sequencing reads were mapped to the Samoa D reference genome.
TPE strain	Poola	Number of paired reads	Output (bp)	Mean insert size (bp)	Number of reads mapped to Samoa Db	Number of contigs mapped to Samoa Db	N50c
CDC 2575	Pool 1	1979360	593808000	194.42	727748	72	27030
CDC 2575	Pool 2	4117249	1235174700	204.873	7208579	348	1296
CDC 2575	Pool 3	5589306	1676791800	182.885	3209607	57	46143
CDC 2575	Pool 4	3943209	1182962700	207.258	7324118	215	28052
Ghana-051	Pool 1	1224344	367303200	345.464	2414664	470	2276
Ghana-051	Pool 2	3821047	1146314100	191.86	7511990	783	2460
Ghana-051	Pool 3	4790430	1437129000	211.637	9308549	607	5037
Ghana-051	Pool 4	3358910	1007673000	209.075	6491100	667	2998
aAltogether, 278 pairs of specific primers were used for amplification of treponemal DNA to obtain overlapping PCR products (TP intervals) covering the entire genomes of both strains. TP intervals were mixed in equimolar
amounts into four distinct pools: Pool-1, Pool-2, Pool-3, and Pool-4 (TP intervals 11A and 25A were mixed into the Pool-4). Prior to Illumina sequencing, the PCR products from each pool were labeled with multiplex
identifier adapters and sequenced as four different samples (see also TableS1).
bTPE Samoa D (GenBank Acc. No. CP002374.1) genome (Čejkova et al. 2012)
chalf of the genome sequence is in contigs larger than or equal to the N50 contig size
